# Supplementary material
Source: publisher figshare collection journal article supplement (https://acs.figshare.com/ndownloader/files/3912496)
Supplement: Supplementary file 1 [file 3912496]

## Supporting information

### Phase transitions and chain dynamics of surfactants intercalated into the galleries of the naturally occurring clay mineral, magadiite

Boris B. Kharkov,<sup>a,b</sup> Robert W. Corkery,<sup>a,c</sup> Sergey V. Dvinskikh<sup>a,b\*</sup>

<sup>a</sup>Royal Institute of Technology KTH, Department of Chemistry, Teknikringen 36, SE-10044 Stockholm, Sweden

<sup>b</sup>St. Petersburg State University, Laboratory of Biomolecular NMR and Institute of Physics, St. Petersburg, 199034 Russia

<sup>c</sup>Australian National University, Research School of Physical Sciences, Canberra ACT 0200 Australia

\*Corresponding author. E-mail: [sergeid@kth.se](mailto:sergeid@kth.se). Phone: +46 8 790 8824. Fax +46 8 790 8207

#### S1. Pulse sequences for SLF spectroscopy under MAS

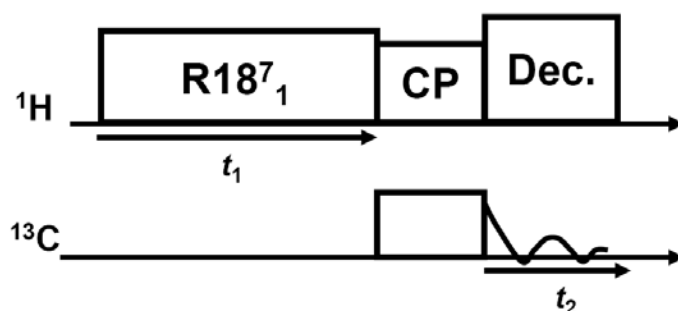

**Figure S1a.** Proton Detected/encoded Local Field spectroscopy with R-type recoupling (R-PDLF).<sup>1</sup> Proton magnetization evolves during the time period  $t_1$  under the effect of the heteronuclear recoupling sequence  $R18^{7,2}$ . This magnetization, modulated by the  $^1\text{H}$ - $^{13}\text{C}$  dipolar interaction, is transferred via cross polarization (CP) to the  $^{13}\text{C}$  spins for detection during  $t_2$  in the presence of the heteronuclear proton decoupling.

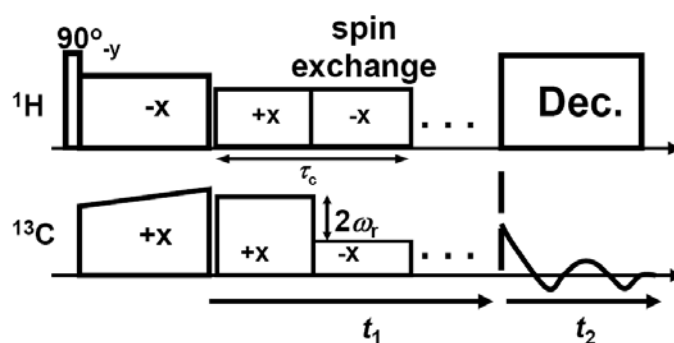

**Figure S1b.** Amplitude- and Phase-Modulated Cross-Polarization (APM-CP).<sup>3,4</sup> After the CP signal enhancement, the dipolar evolution period is initiated by inverting the phase of the  $^1\text{H}$  spin-lock field. The CP fields during  $t_1$  period are phase- and amplitude-modulated to achieve the  $^1\text{H}$ - $^{13}\text{C}$  heteronuclear dipolar recoupling. Finally, the  $^{13}\text{C}$  signal is detected in the presence of the heteronuclear  $^1\text{H}$  decoupling.

## S2. Carbon-13 MAS spectra in CTA/Magadiite

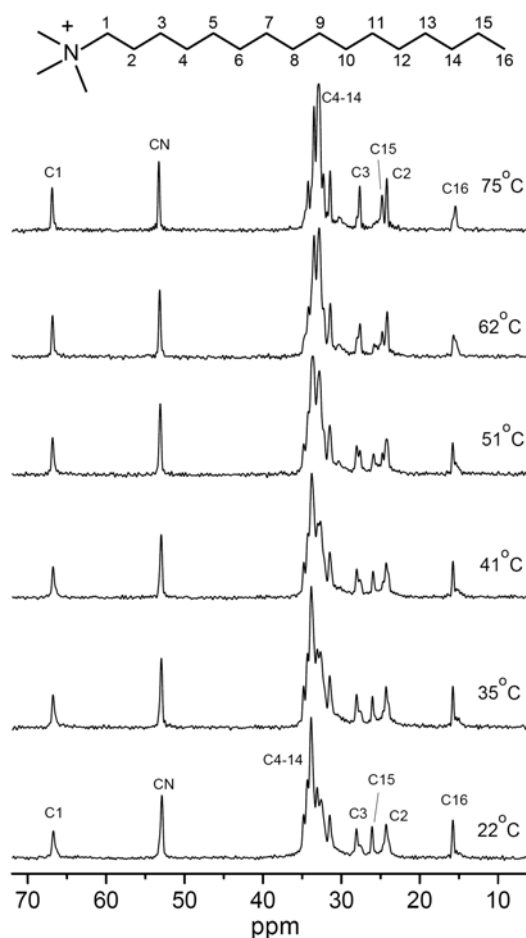

**Figure S2a.**  $^{13}\text{C}$  MAS NMR proton decoupled spectra of CTA/magadiite composite recorded at indicated temperatures.

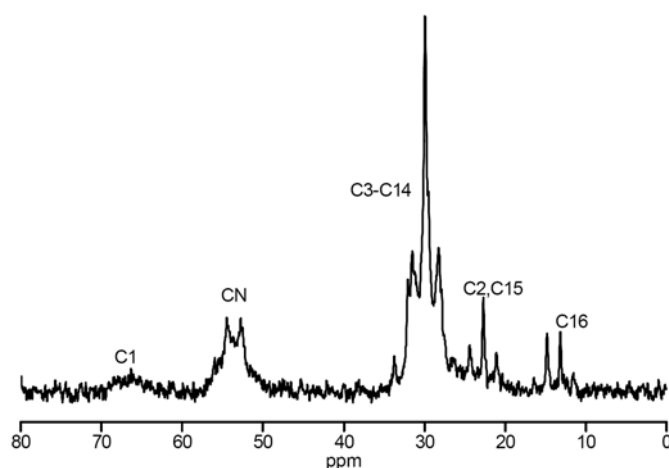

**Figure S2b.**  $^{13}\text{C}$  MAS NMR spectrum of CTA/magadiite at 110 °C recorded without proton decoupling.  $J$ -coupled multiplets are resolved.

$J$ -resolved multiplets indirectly indicate the presence of translational dynamics. Low limit of the diffusion coefficient can be estimated from the Einstein-Smoluchowski relationship  $D = \langle R^2 \rangle / 2\tau \sim 10^{-14} \text{ m}^2/\text{s}$ , with  $\tau = 1/(2\pi D_{\text{HH}})$ ,  $D_{\text{HH}} \sim 10 \text{ kHz}$ ,  $\langle R^2 \rangle^{1/2} \sim 10^{-9} \text{ m}$ .

### S3. 2D HETCOR $^{13}\text{C}$ - $^1\text{H}$ spectrum in CTA/magadiite

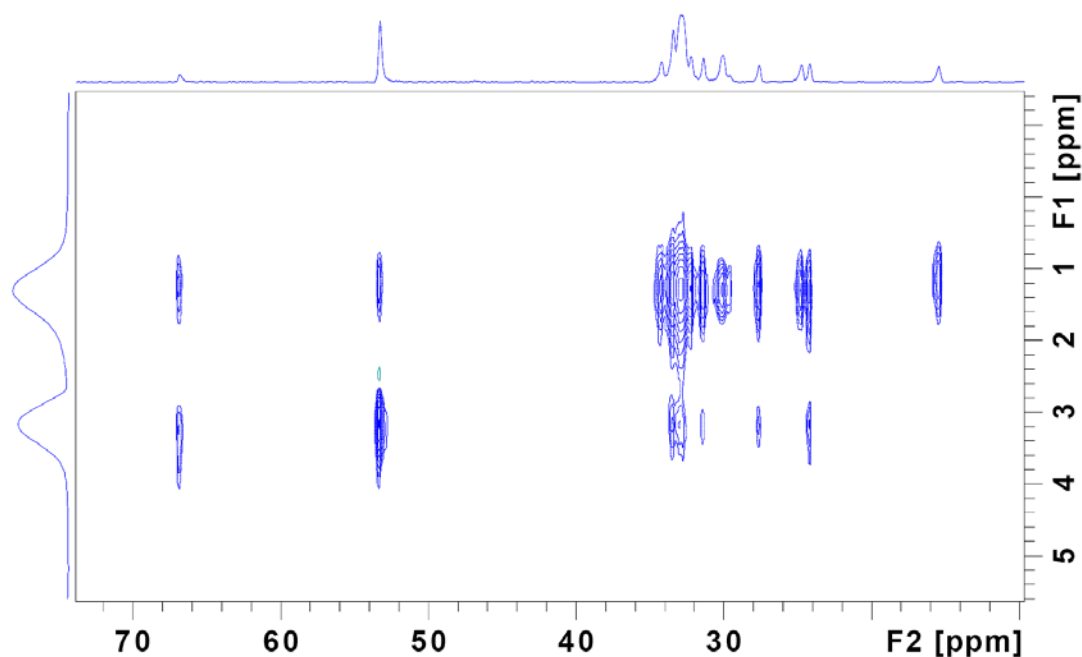

**Figure S3.** 2D heteronuclear correlation (HETCOR<sup>5</sup>)  $^{13}\text{C}$ - $^1\text{H}$  spectrum of CTA/magadiite composite in phase II at 75 °C.

Cross-peak C1/C2 in HETCOR spectrum aids to resolve an ambiguity of the C2 and C15 assignments.

### S4. $^{29}\text{Si}$ MAS spectra in magadiite and CTA/Magadiite

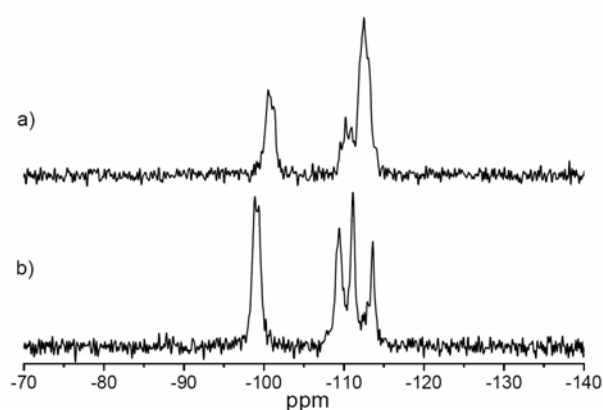

**Figure S4.** Silicon-29 MAS NMR spectra of (a) CTA/magadiite composite and (b) unmodified natural magadiite. Spinning speed 8 kHz, relaxation delay 960 s, number of scans 32, room temperature.

Silicon-29 MAS NMR spectrum of untreated magadiite exhibits two partly-resolved  $\text{Q}^3$  and three well-resolved  $\text{Q}^4$  sites in excellent agreement with previous studies.<sup>6</sup>

## References

- (1) Dvinskikh, S. V.; Zimmermann, H.; Maliniak, A.; Sandström, D. Measurements of Motionally Averaged Heteronuclear Dipolar Couplings in MAS NMR using R-type Recoupling, *J. Magn. Reson.* **2004**, *168*, 194-201.
- (2) Zhao, X.; Edén, M.; Levitt, M. H. Recoupling of heteronuclear dipolar interactions in solid-state NMR using symmetry-based pulse sequences, *Chem. Phys. Lett.* **2001**, *342*, 353-361.
- (3) Dvinskikh, S. V.; Castro, V.; Sandström, D. Probing Segmental Order in Lipid Bilayers at Variable Hydration Levels by Amplitude- and Phase-Modulated Cross-Polarization NMR, *Phys. Chem. Chem. Phys.* **2005**, *7*, 3255-3257.
- (4) Dvinskikh, S. V.; Chizhik, V. I. Cross-Polarization with Radio-Frequency Field Phase and Amplitude Modulation under Magic-Angle Spinning Conditions, *J. Exp. Theor. Phys.* **2006**, *102*, 91-101.
- (5) vanRossum, B. J.; Forster, H.; deGroot, H. J. M. High-field and high-speed CP-MAS C-13 NMR heteronuclear dipolar-correlation spectroscopy of solids with frequency-switched Lee-Goldburg homonuclear decoupling, *J. Magn. Reson.* **1997**, *124*, 516-519.
- (6) Almond, G. G.; Harris, R. K.; Graham, P. A Study of the Layered Alkali-Metal Silicate, Magadiite, by One-Dimensional and 2-Dimensional H-1 and Si-29 NMR-Spectroscopy, *J. Chem. Soc., Chem. Commun.* **1994**, 851-852.
